# Supplementary material for: A reverse membrane emulsification process based on a hierarchically porous monolith for high efficiency water–oil separation
Source: Royal Society of Chemistry journal article supplement (doi:10.1039/c2ta00007e), 2012-11-21
Supplement: c2ta00007e.pdf [file c2ta00007e.pdf]

Cite this: DOI: 10.1039/c0xx00000x

www.rsc.org/xxxxxx

ARTICLE TYPE

## Reverse Membrane Emulsification Process based on Hierarchically Porous Monolith for High Efficiency Water-Oil Separation

Yuchao Wang, Shengyang Tao\* and Yonglin An

Department of Chemistry, Dalian University of Technology, Dalian, Liaoning, P. R. China. Fax: +86-411-84986035; Tel: +86-411-84986035; E-mail: taosy@dlut.edu.cn

Received (in XXX, XXX) Xth XXXXXXXXXX 20XX, Accepted Xth XXXXXXXXXX 20XX

DOI: 10.1039/b000000x

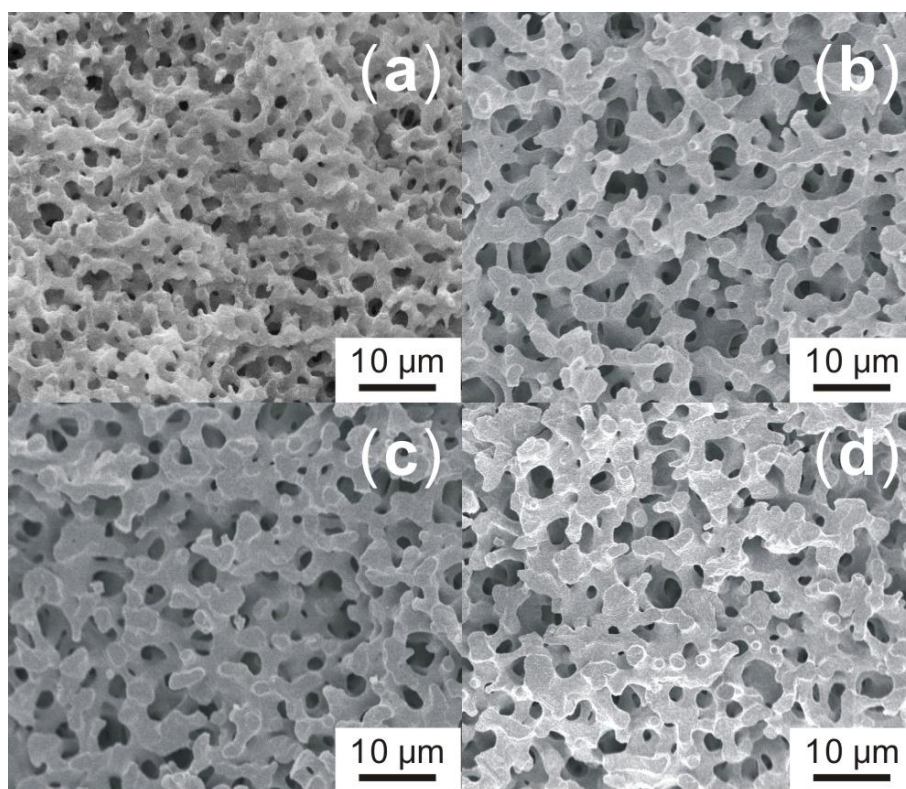

**Figure S1.** SEM images of HPSM-1 (a), HPSM-18 (b), HPSM-B (c) and HPSM (d), respectively.

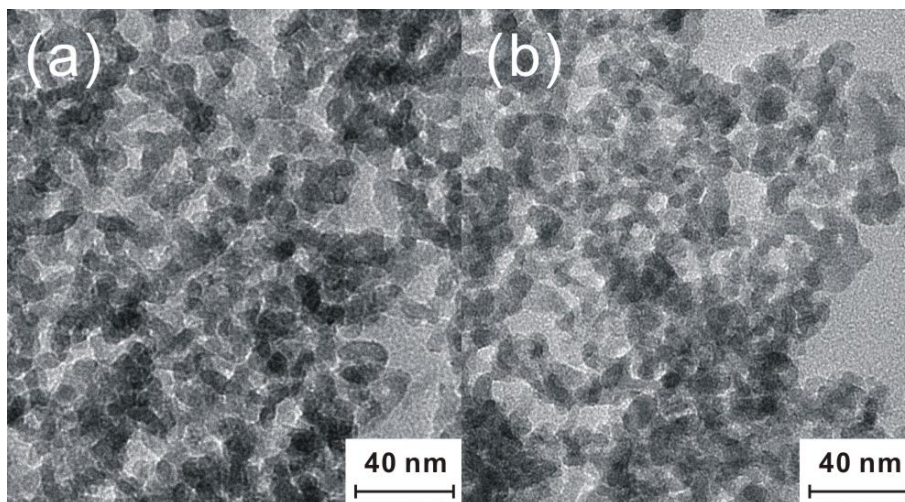

**Figure S2.** TEM images of PSM (a) and HPSM-8 (b), respectively.

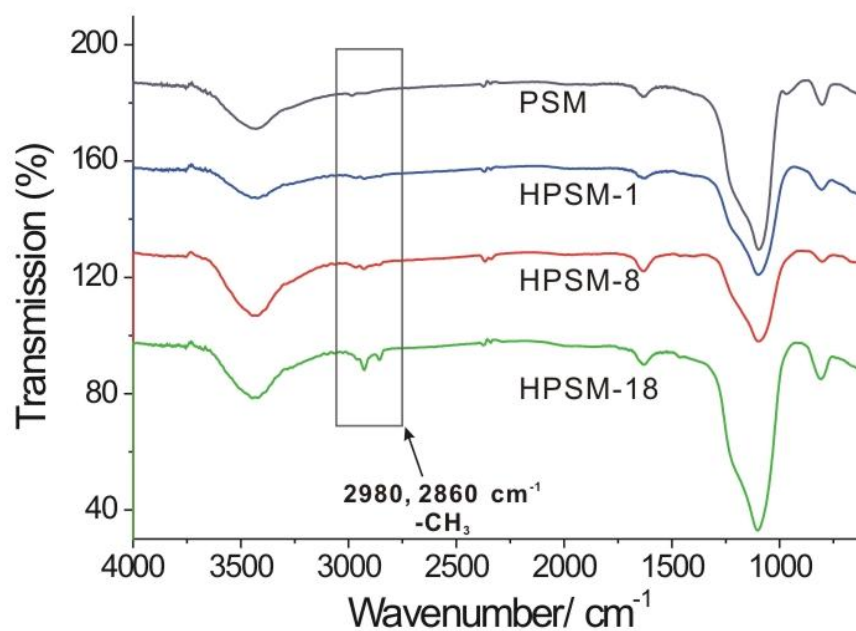

**Figure S3.** FT-IR spectrum of PSM and HPSM modified with alkyl groups. Bands of HPSMs at 2980 and 2860 cm<sup>-1</sup> corresponding to -CH<sub>3</sub>, could be observed clearly, illuminate that the alkyl groups have been grafted on the surface successfully.

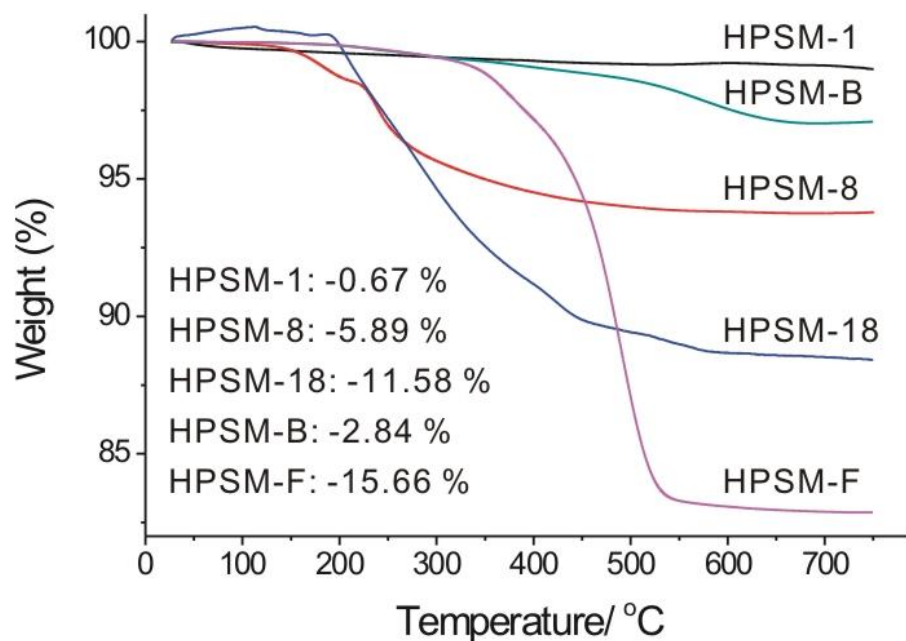

**Figure S4.** Thermogravimetric Analysis (TGA) of HPSMs. The degree of coverage can be calculated by the data of mass loss from 150 °C to 750 °C, induced by the decomposition of functional groups.

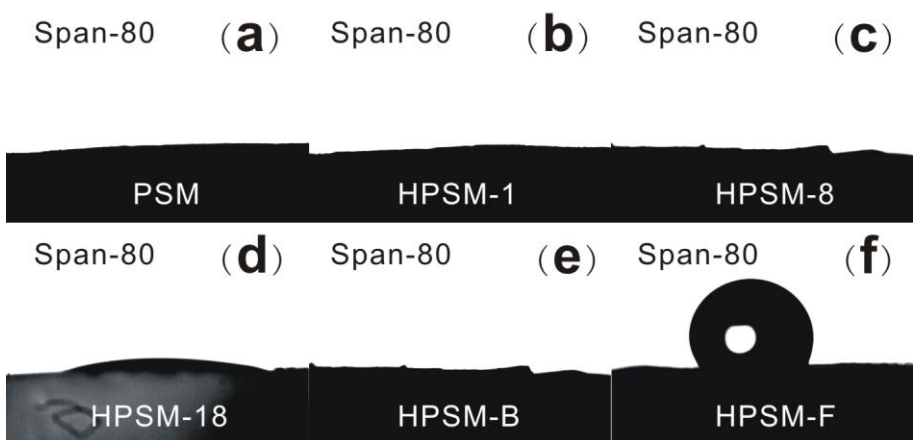

**Figure S5.** The images of the contact angles with surfactant (Span-80, 5  $\mu$ L) of PSM (A), HPSM-1 (B), HPSM-8 (C), HPSM-18 (D), HPSM-B (E) and HPSM-F (F).
